# Supplementary material for: Discovery of Acyl-Surugamide A2 from Marine Streptomyces albidoflavus RKJM-0023—A New Cyclic Nonribosomal Peptide Containing an N-ε-acetyl-L-lysine Residue
Source: MDPI journal article supplement (doi:10.3390/molecules29071482), 2024-03-27
Supplement: s1 [file s1]

# Discovery of Acyl-Surugamide A2 from Marine *Streptomyces albidoflavus* RKJM-0023—A New Cyclic Nonribosomal Peptide Containing an N- $\epsilon$ -acetyl-L-lysine Residue

Zacharie A. Maw <sup>1</sup>, Bradley Haltli <sup>1,2</sup>, Jason J. Guo <sup>3</sup>, Donna M. Baldisseri <sup>4</sup>, Christopher Cartmell <sup>5,\*</sup> and Russell G. Kerr <sup>1,2,6,\*</sup>

- <sup>1</sup> Department of Biomedical Sciences, Atlantic Veterinary College, University of Prince Edward Island, Charlottetown, PE C1A 4P3, Canada; zmaw@upei.ca (Z.A.M.)
  - <sup>2</sup> Nautilus Biosciences, Croda Canada Limited, Charlottetown, PE C1A 4P3, Canada
  - <sup>3</sup> Department of Chemistry & Chemical Biology, Barnett Institute for Chemical and Biological Analysis, Northeastern University, Boston, MA 02115, USA
  - <sup>4</sup> Bruker Biospin Corp., 15 Fortune Drive, Billerica, MA 01821, USA
  - <sup>5</sup> Department of Pharmacology, Comprehensive Center for Pain & Addiction, College of Medicine, University of Arizona, Tucson, AZ 85724, USA
  - <sup>6</sup> Department of Chemistry, University of Prince Edward Island, Charlottetown, PE C1A 4P3, Canada
- \* Correspondence: cartmell@arizona.edu (C.C.); rkerr@upei.ca (R.G.K.)

## Supporting Information

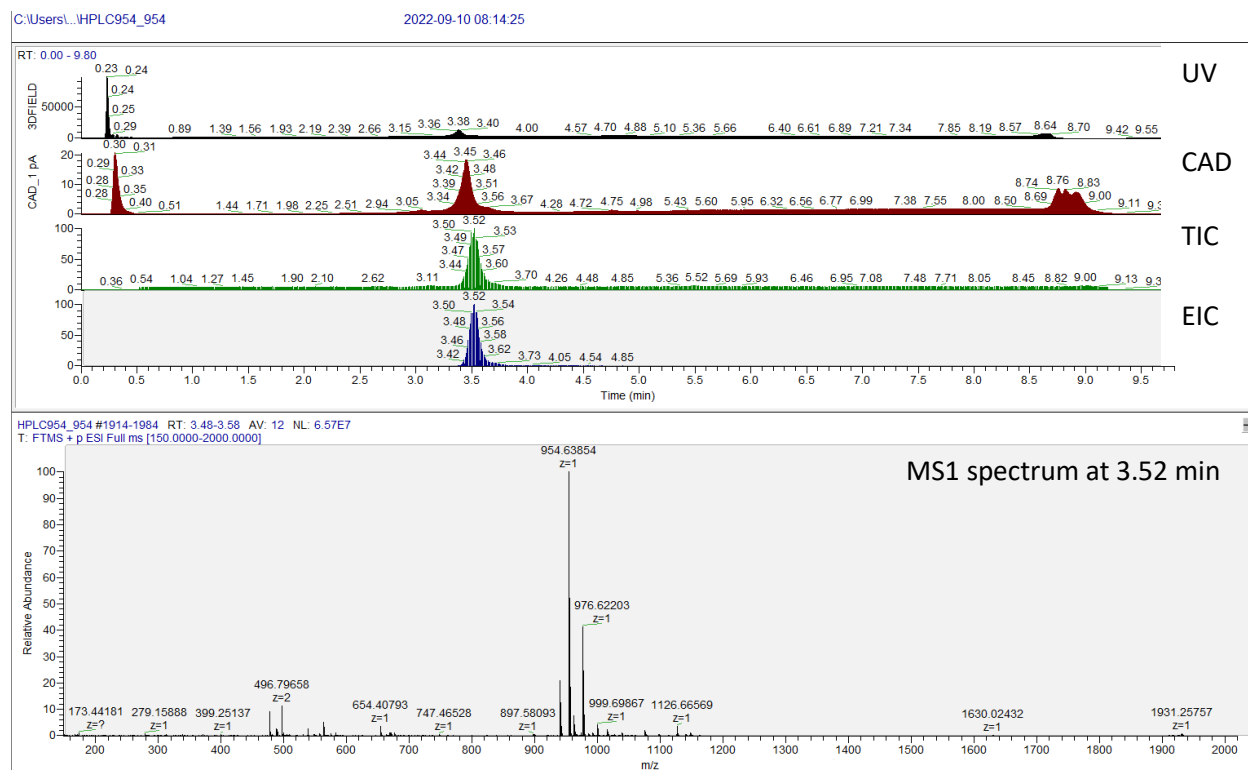



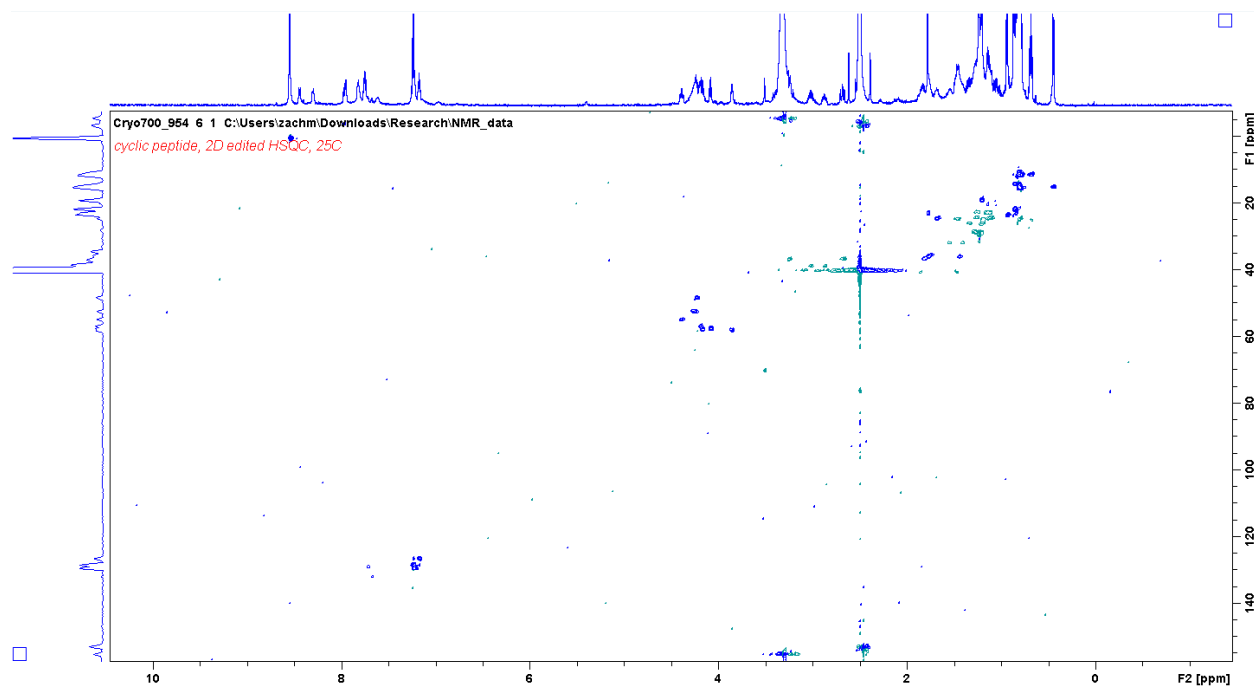

**Figure S4.** HSQC ( $^1\text{H}$  600 MHz,  $^{13}\text{C}$  150 MHz,  $\text{DMSO-}d_6$ ) for Acyl-Surugamide A2 (**1**).

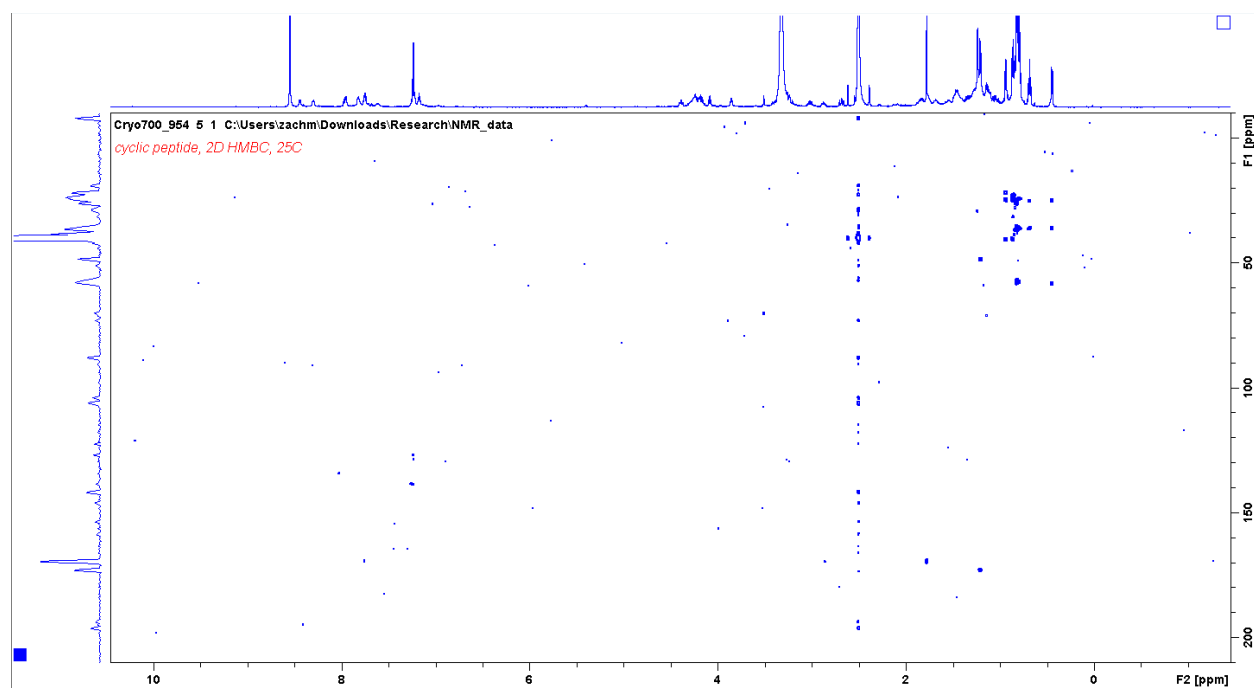

**Figure S5.** HMBC ( $^1\text{H}$  600 MHz,  $^{13}\text{C}$  150 MHz,  $\text{DMSO-}d_6$ ) for Acyl-Surugamide A2 (**1**).

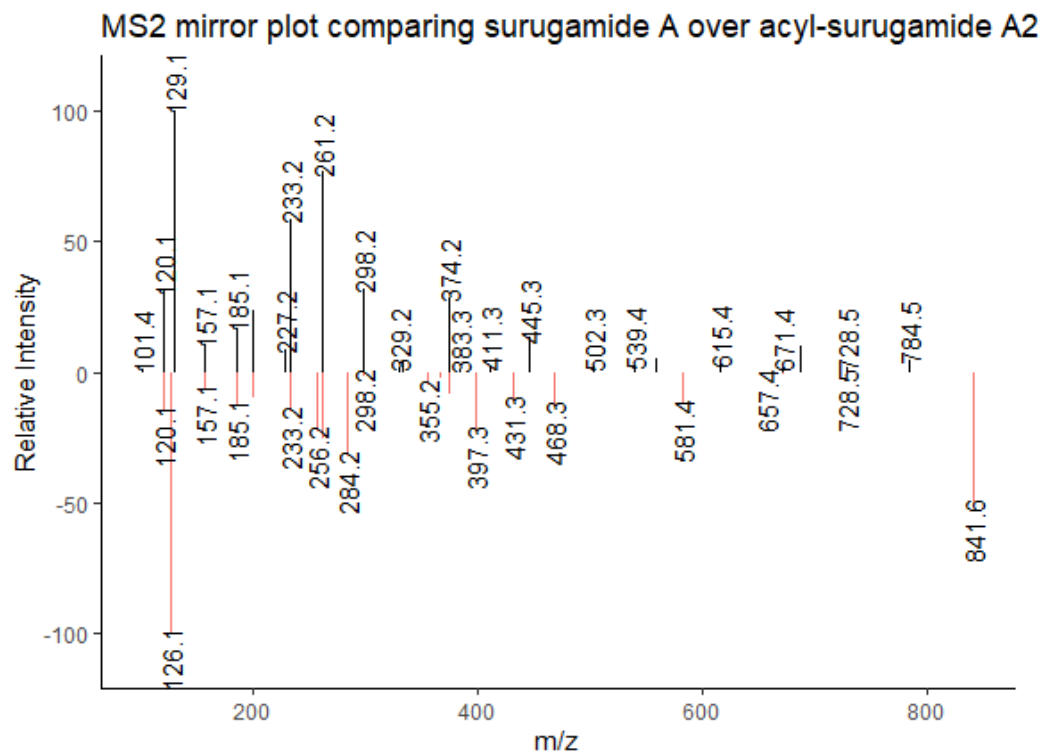

**Figure S6.** MS2 mirror plot comparing the MS2 spectrum of surugamide A (912) to acyl-surugamide A2 (954).

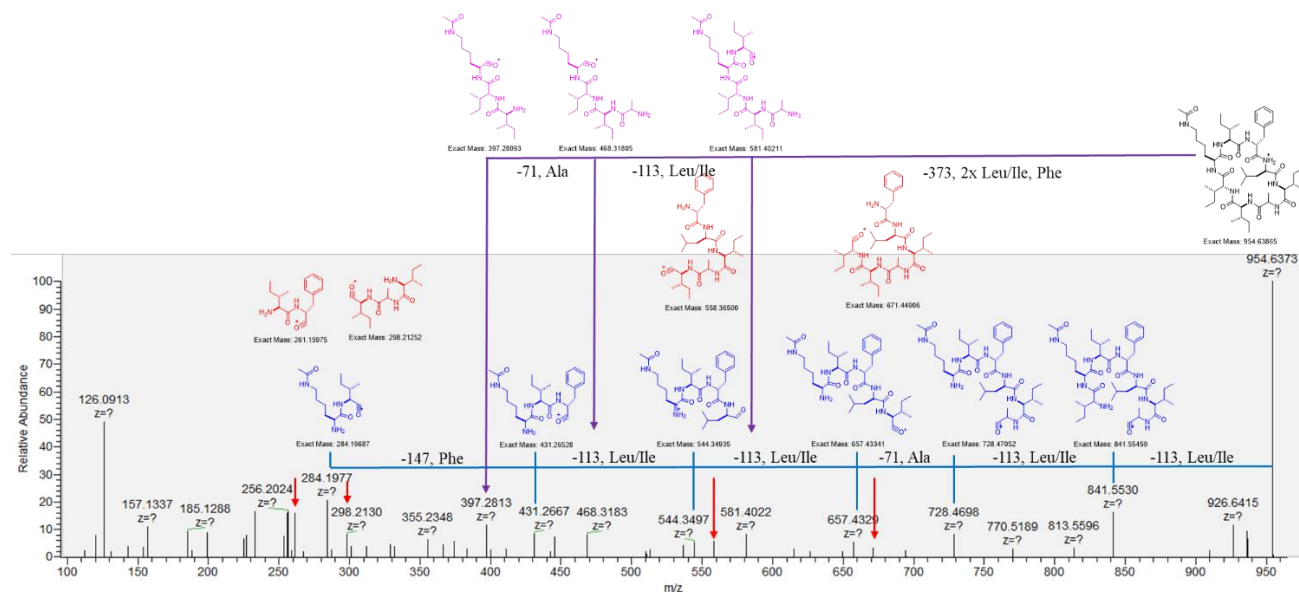

**Figure S7.** MS2 fragment structures of key acyl-surugamide A2 fragments. The fragments are structurally grouped; in blue are the iterative fragment structures N-terminus acetyl-lysine, in purple are the identified fragments ending with C-terminus acetyl-lysine, and red are fragments with exact matches for surugamide A fragments used to confirm the sequence without acetyl-lysine.

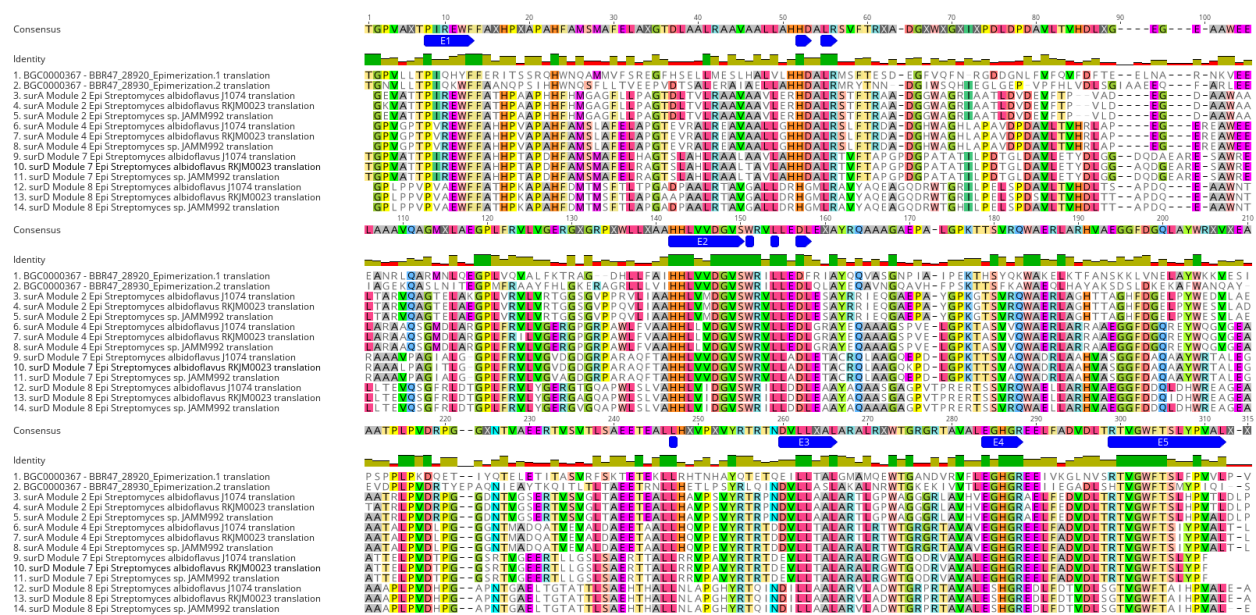

**Figure S8.** MUSCLE protein alignment of the epimerization domains for the *sur* BGCs from *S. albidoflavus* RKJM0023 (CP133227), J1074 (BGC0001792, CP004370.1) and JAMM993 (*surA* AXN72677.1, *surD* AXN72680.1), compared to the first two epimerization domains of the gramicidin BGC (BGC000367, AP008955.1). Blue annotations indicate the highly conserved active site motifs for a functional epimerization domain.
